# Supplementary material for: CO2 formation mechanism in Fischer–Tropsch synthesis over iron-based catalysts: a combined experimental and theoretical study
Source: Royal Society of Chemistry journal article supplement (doi:10.1039/c8cy01621f), 2018-01-01
Supplement: c8cy01621f1.pdf [file c8cy01621f1.pdf]

## Supporting Information

### **CO<sub>2</sub> formation mechanism in Fischer-Tropsch synthesis over iron-based catalysts: A combined experimental and theoretical study**

*Bing Liu,<sup>†</sup> Wenping Li,<sup>†</sup> Jiao Zheng, Qiang Lin, Xin Zhang, Junwei Zhang, Feng Jiang, Yuebing Xu and Xiaohao Liu\**

*Department of Chemical Engineering, School of Chemical and Material Engineering, Jiangnan University, Wuxi 214122, P. R. China*

<sup>†</sup> These authors contributed equally to this work

\* Corresponding author:

Email: [liuxh@jiangnan.edu.cn](mailto:liuxh@jiangnan.edu.cn) (X.L)

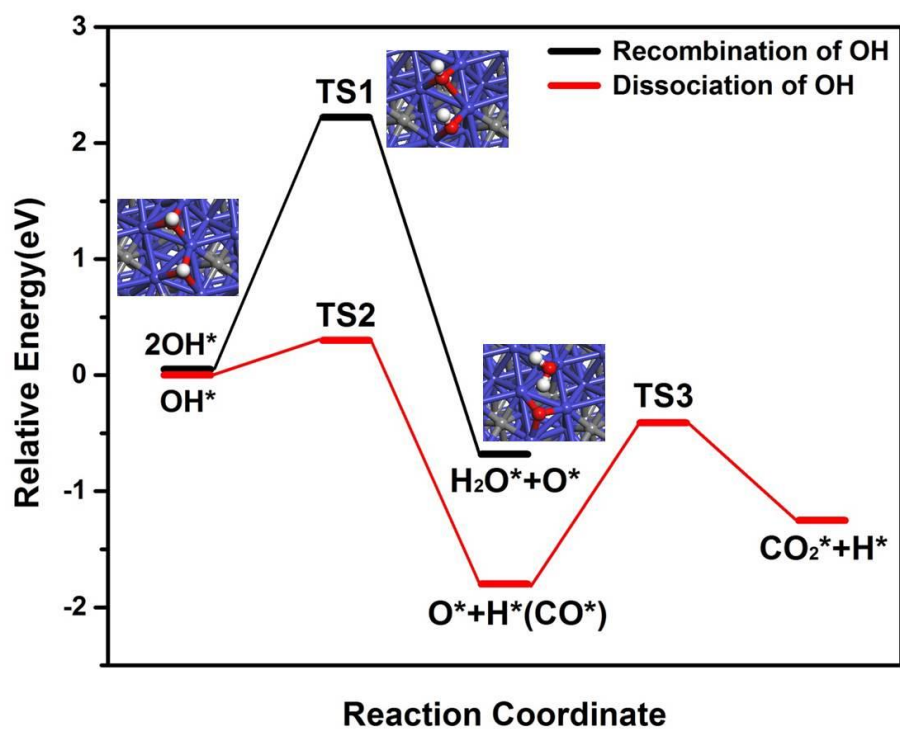

**Figure S1.** Energy profiles for the recombination of 2OH to form H<sub>2</sub>O and the dissociation of OH to form CO<sub>2</sub> over  $\chi$ -Fe<sub>5</sub>C<sub>2</sub>(510).

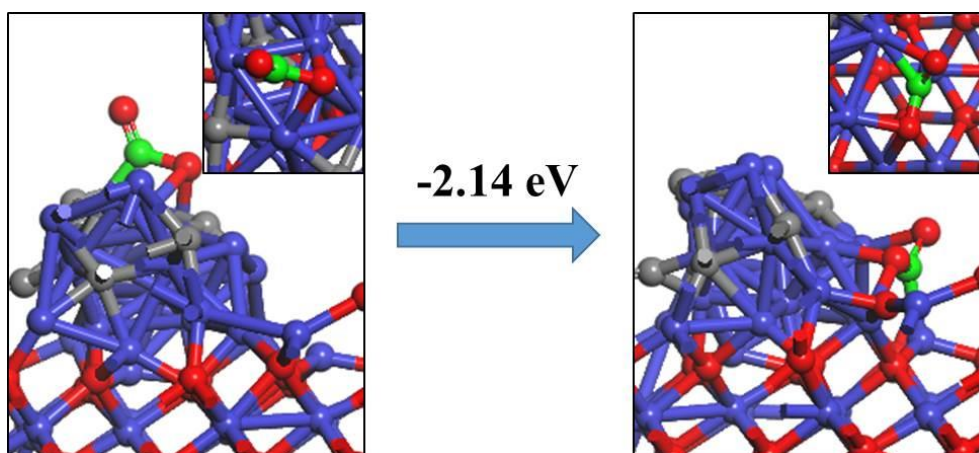

**Figure S2.** CO<sub>2</sub> spillover from Fe<sub>5</sub>C<sub>2</sub> to Fe<sub>3</sub>O<sub>4</sub> and the corresponding energy.

**(a)**  $E_{\text{ads}} = -3.32 \text{ eV}$

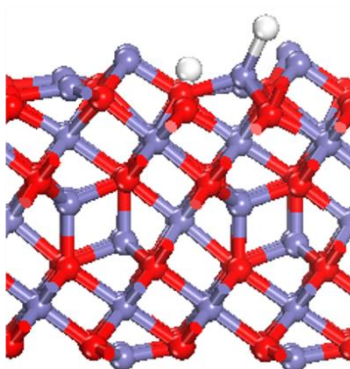

**2H adsorption**

**(b)**  $E_{\text{ads}} = -1.56 \text{ eV}$

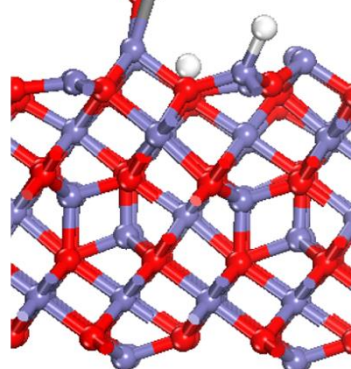

**CO<sub>2</sub> adsorption**

**Figure S3.** Adsorption energies for 2H and CO<sub>2</sub> over Fe<sub>3</sub>O<sub>4</sub>(111) surface.

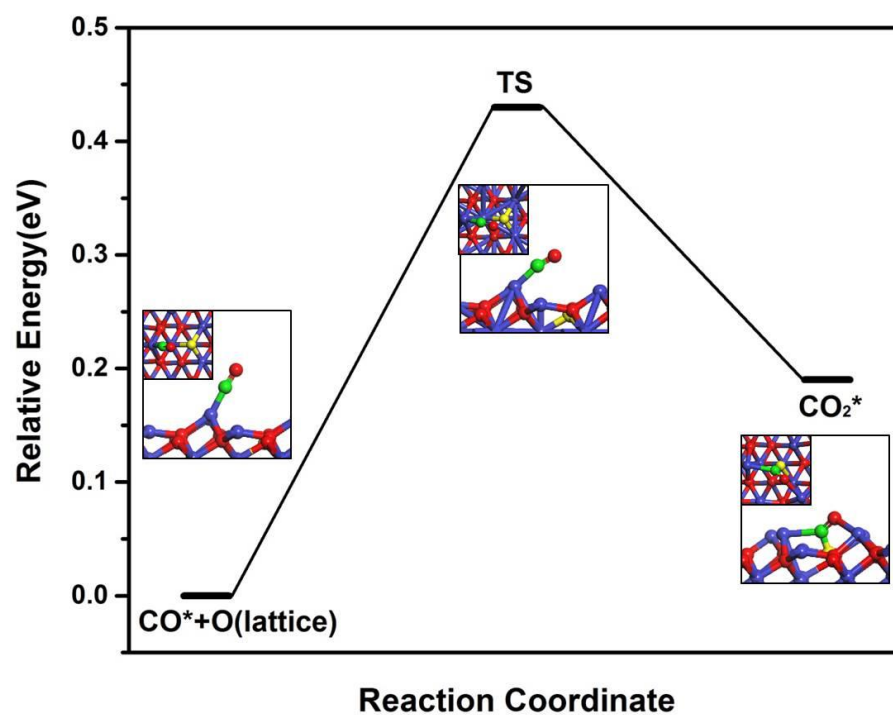

**Figure S4.** CO<sub>2</sub> formation through the reaction between CO and lattice O in Fe<sub>3</sub>O<sub>4</sub>(111).
